# Supplementary material
Source: publisher site journal article supplement (http://www.kjim.org/upload/media/kjim-2019-153-suppl2.pdf)
Supplement: Supplementary file 1 [file kjim-2019-153-suppl2.pdf]

**Supplementary Table 2. Duration and dose of corticosteroids**

| Corticosteroids    | Total (n = 404) | Equivalent dose, mg | Duration, day |
|--------------------|-----------------|---------------------|---------------|
| Methylprednisolone | 141 (34.9)      | 93 ± 37             | 31 ± 29       |
| Hydrocortisone     | 253 (62.6)      | 44 ± 8              | 20 ± 30       |
| Dexamethasone      | 8 (2.0)         | 122 ± 49            | 6 ± 4         |
| Prednisolone       | 2 (0.5)         | 112 ± 68            | 4 ± 4         |

Values are presented as number (%) or mean ± SD. Doses of corticosteroids were converted equivalent to 1 mg of methylprednisolone.
